# Supplementary material
Source: MDPI journal article supplement (https://www.mdpi.com/2071-1050/11/7/2097)
Supplement: s1 [file s1]

*Supplementary Material*

# **Corporate Social Responsibility Practices in USA: Using Reverse Supply Chain Network Design and Optimization Considering Carbon Cost**

## **Content**

### **Part I: Methods**

Table S1. Orthogonal Arrays of 27 experiments to satisfy 13 factors, each with three different levels used to quantitative evaluation and performance of the mixed-integer linear programming model.

### **Part II: Experiments Results**

Table S2. Optimal number of units transported for experiment 1

Table S3. Optimal number of units transported for experiment 2

Table S4. Optimal number of units transported for experiment 3

Table S5. Optimal number of units transported for experiment 4

Table S6. Optimal number of units transported for experiment 5

Table S7. Optimal number of units transported for experiment 6

Table S8. Optimal number of units transported for experiment 7

Table S9. Optimal number of units transported for experiment 8

Table S10. Optimal number of units transported for experiment 9

Table S11. Optimal number of units transported for experiment 10

Table S12. Optimal number of units transported for experiment 11

Table S13. Optimal number of units transported for experiment 12

Table S14. Optimal number of units transported for experiment 13

Table S15. Optimal number of units transported for experiment 14

Table S16. Optimal number of units transported for experiment 15

Table S17. Optimal number of units transported for experiment 16

Table S18. Optimal number of units transported for experiment 17

Table S19. Optimal number of units transported for experiment 18

**Table S20. Optimal number of units transported for experiment 19**

**Table S21. Optimal number of units transported for experiment 20**

**Table S22. Optimal number of units transported for experiment 21**

**Table S23. Optimal number of units transported for experiment 22**

**Table S24. Optimal number of units transported for experiment 23**

**Table S25. Optimal number of units transported for experiment 24**

**Table S26. Optimal number of units transported for experiment 25**

**Table S27. Optimal number of units transported for experiment 26**

**Table S28. Optimal number of units transported for experiment 27**

### **Part III: Data**

**Figure S1.** Electricity usage data derived from Commercial Buildings Energy Consumption Survey (CBECS) for retail sector of New England region

**Figure S2.** Energy usage data derived from Commercial Buildings Energy Consumption Survey (CBECS) for retail sector of New England region

**Figure S3.** Electricity usage data derived from Manufacturing Energy Consumption Survey (MECS) for electrical equipment, appliances, and components industry of New England region

**Figure S4.** Energy usage data derived from Manufacturing Energy Consumption Survey (MECS) for electrical equipment, appliances, and components industry of New England region

**Table S29.** Actual rent cost for collection centers (Melrose, Canton, and Natick), two remanufacturing facilities (Taunton and Hingham), and three reselling centers (Revere, Boston, and Somerville) used in the deterministic model

**Table S30.** Actual number of laborers and their cost per year for collection centers (Melrose, Canton, and Natick), two remanufacturing facilities (Taunton and Hingham), and three reselling centers (Revere, Boston, and Somerville) used in the deterministic model

**Table S31.** Actual trip distances between locations in miles

### **Part IV: Statistical Analysis Results**

**Figure S5.** The residuals plotted against the predicted values, to test homogeneousness of the residual

**Figure S6.** Normal probability plot of residuals to test normality assumption

## Part I: Method

**Table S1.** Orthogonal Arrays of 27 experiments to satisfy 13 factors, each with three different levels used to quantitative evaluation and performance of the mixed-integer linear programming model.

| Experiment<br>s | Factors                 |                      |                           |              |               |                          |                  |                         |                     |                   |                   |                    |                |
|-----------------|-------------------------|----------------------|---------------------------|--------------|---------------|--------------------------|------------------|-------------------------|---------------------|-------------------|-------------------|--------------------|----------------|
|                 | Transportatio<br>n Cost | Energy<br>Cost - fix | Energy Cost<br>- variable | Rent<br>Cost | Labor<br>Cost | Social Cost<br>of Carbon | Shortage<br>Cost | Remanufacturing<br>Cost | Mean demand<br>rate | Retrieval<br>Cost | Inventory<br>Cost | Inventory<br>level | Supply<br>rate |
| 1               | 1                       | 1                    | 1                         | 1            | 1             | 1                        | 1                | 1                       | 1                   | 1                 | 1                 | 1                  | 1              |
| 2               | 1                       | 1                    | 1                         | 1            | 2             | 2                        | 2                | 2                       | 2                   | 2                 | 2                 | 2                  | 2              |
| 3               | 1                       | 1                    | 1                         | 1            | 3             | 3                        | 3                | 3                       | 3                   | 3                 | 3                 | 3                  | 3              |
| 4               | 1                       | 2                    | 2                         | 2            | 1             | 1                        | 1                | 2                       | 2                   | 2                 | 3                 | 3                  | 3              |
| 5               | 1                       | 2                    | 2                         | 2            | 2             | 2                        | 2                | 3                       | 3                   | 3                 | 1                 | 1                  | 1              |
| 6               | 1                       | 2                    | 2                         | 2            | 3             | 3                        | 3                | 1                       | 1                   | 1                 | 2                 | 2                  | 2              |
| 7               | 1                       | 3                    | 3                         | 3            | 1             | 1                        | 1                | 3                       | 3                   | 3                 | 2                 | 2                  | 2              |
| 8               | 1                       | 3                    | 3                         | 3            | 2             | 2                        | 2                | 1                       | 1                   | 1                 | 3                 | 3                  | 3              |
| 9               | 1                       | 3                    | 3                         | 3            | 3             | 3                        | 3                | 2                       | 2                   | 2                 | 1                 | 1                  | 1              |
| 10              | 2                       | 1                    | 2                         | 3            | 1             | 2                        | 3                | 1                       | 2                   | 3                 | 1                 | 2                  | 3              |
| 11              | 2                       | 1                    | 2                         | 3            | 2             | 3                        | 1                | 2                       | 3                   | 1                 | 2                 | 3                  | 1              |
| 12              | 2                       | 1                    | 2                         | 3            | 3             | 1                        | 2                | 3                       | 1                   | 2                 | 3                 | 1                  | 2              |
| 13              | 2                       | 2                    | 3                         | 1            | 1             | 2                        | 3                | 2                       | 3                   | 1                 | 3                 | 1                  | 2              |
| 14              | 2                       | 2                    | 3                         | 1            | 2             | 3                        | 1                | 3                       | 1                   | 2                 | 1                 | 2                  | 3              |
| 15              | 2                       | 2                    | 3                         | 1            | 3             | 1                        | 2                | 1                       | 2                   | 3                 | 2                 | 3                  | 1              |
| 16              | 2                       | 3                    | 1                         | 2            | 1             | 2                        | 3                | 3                       | 1                   | 2                 | 2                 | 3                  | 1              |
| 17              | 2                       | 3                    | 1                         | 2            | 2             | 3                        | 1                | 1                       | 2                   | 3                 | 3                 | 1                  | 2              |
| 18              | 2                       | 3                    | 1                         | 2            | 3             | 1                        | 2                | 2                       | 3                   | 1                 | 1                 | 2                  | 3              |
| 19              | 3                       | 1                    | 3                         | 2            | 1             | 3                        | 2                | 1                       | 3                   | 2                 | 1                 | 3                  | 2              |
| 20              | 3                       | 1                    | 3                         | 2            | 2             | 1                        | 3                | 2                       | 1                   | 3                 | 2                 | 1                  | 3              |
| 21              | 3                       | 1                    | 3                         | 2            | 3             | 2                        | 1                | 3                       | 2                   | 1                 | 3                 | 2                  | 1              |
| 22              | 3                       | 2                    | 1                         | 3            | 1             | 3                        | 2                | 2                       | 1                   | 3                 | 3                 | 2                  | 1              |
| 23              | 3                       | 2                    | 1                         | 3            | 2             | 1                        | 3                | 3                       | 2                   | 1                 | 1                 | 3                  | 2              |
| 24              | 3                       | 2                    | 1                         | 3            | 3             | 2                        | 1                | 1                       | 3                   | 2                 | 2                 | 1                  | 3              |
| 25              | 3                       | 3                    | 2                         | 1            | 1             | 3                        | 2                | 3                       | 2                   | 1                 | 2                 | 1                  | 3              |

|           |   |   |   |   |   |   |   |   |   |   |   |   |   |
|-----------|---|---|---|---|---|---|---|---|---|---|---|---|---|
| <b>26</b> | 3 | 3 | 2 | 1 | 2 | 1 | 3 | 1 | 3 | 2 | 3 | 2 | 1 |
| <b>27</b> | 3 | 3 | 2 | 1 | 3 | 2 | 1 | 2 | 1 | 3 | 1 | 3 | 2 |

## Part II: Experiments Results

**Table S2.** Optimal number of units transported for experiment 1.

| <b>From \ To</b>  | <b>Taunton</b> | <b>Hingham</b> |
|-------------------|----------------|----------------|
| <b>Melrose</b>    | 5              | 58             |
| <b>Canton</b>     | 78             | 5              |
| <b>Natick</b>     | 5              | 92             |
| <b>Revere</b>     | 54             | 5              |
| <b>Boston</b>     | 30             | 64             |
| <b>Somerville</b> | 5              | 88             |

**Table S- 1.** Optimal number of units transported for experiment 2.

| <b>From \ To</b>  | <b>Taunton</b> | <b>Hingham</b> |
|-------------------|----------------|----------------|
| <b>Melrose</b>    | 5              | 112            |
| <b>Canton</b>     | 151            | 5              |
| <b>Natick</b>     | 5              | 180            |
| <b>Revere</b>     | 102            | 5              |
| <b>Boston</b>     | 54             | 122            |
| <b>Somerville</b> | 5              | 170            |

**Table S- 2:** Optimal number of units transported for experiment 3.

| <b>From \ To</b>  | <b>Taunton</b> | <b>Hingham</b> |
|-------------------|----------------|----------------|
| <b>Melrose</b>    | 5              | 166            |
| <b>Canton</b>     | 218            | 5              |
| <b>Natick</b>     | 5              | 145            |
| <b>Revere</b>     | 121            | 5              |
| <b>Boston</b>     | 102            | 107            |
| <b>Somerville</b> | 5              | 203            |

**Table S- 3:** Optimal number of units transported for experiment 4.

| <b>From \ To</b>  | <b>Taunton</b> | <b>Hingham</b> |
|-------------------|----------------|----------------|
| <b>Melrose</b>    | 76             | 95             |
| <b>Canton</b>     | 10             | 5              |
| <b>Natick</b>     | 268            | 180            |
| <b>Revere</b>     | 81             | 26             |
| <b>Boston</b>     | 5              | 171            |
| <b>Somerville</b> | 5              | 170            |

**Table S- 4:** Optimal number of units transported for experiment 5.

| <b>From \ To</b> | <b>Taunton</b> | <b>Hingham</b> |
|------------------|----------------|----------------|
| <b>Melrose</b>   | 59             | 5              |
| <b>Canton</b>    | 23             | 5              |
| <b>Natick</b>    | 5              | 92             |
| <b>Revere</b>    | 54             | 5              |

|                   |    |    |
|-------------------|----|----|
| <b>Boston</b>     | 28 | 42 |
| <b>Somerville</b> | 5  | 55 |

**Table S- 5:** Optimal number of units transported for experiment 6.

| <b>From \ To</b>  | <b>Taunton</b> | <b>Hingham</b> |
|-------------------|----------------|----------------|
| <b>Melrose</b>    | 5              | 112            |
| <b>Canton</b>     | 5              | 5              |
| <b>Natick</b>     | 5              | 112            |
| <b>Revere</b>     | 5              | 54             |
| <b>Boston</b>     | 5              | 88             |
| <b>Somerville</b> | 5              | 87             |

**Table S- 6:** Optimal number of units transported for experiment 7.

| <b>From \ To</b>  | <b>Taunton</b> | <b>Hingham</b> |
|-------------------|----------------|----------------|
| <b>Melrose</b>    | 62             | 55             |
| <b>Canton</b>     | 162            | 5              |
| <b>Natick</b>     | 5              | 255            |
| <b>Revere</b>     | 121            | 5              |
| <b>Boston</b>     | 103            | 107            |
| <b>Somerville</b> | 5              | 203            |

**Table S- 7:** Optimal number of units transported for experiment 8.

| <b>From \ To</b>  | <b>Taunton</b> | <b>Hingham</b> |
|-------------------|----------------|----------------|
| <b>Melrose</b>    | 5              | 165            |
| <b>Canton</b>     | 5              | 5              |
| <b>Natick</b>     | 5              | 58             |
| <b>Revere</b>     | 5              | 53             |
| <b>Boston</b>     | 5              | 88             |
| <b>Somerville</b> | 5              | 87             |

**Table S- 8:** Optimal number of units transported for experiment 9.

| <b>From \ To</b>  | <b>Taunton</b> | <b>Hingham</b> |
|-------------------|----------------|----------------|
| <b>Melrose</b>    | 56             | 52             |
| <b>Canton</b>     | 168            | 5              |
| <b>Natick</b>     | 5              | 172            |
| <b>Revere</b>     | 102            | 5              |
| <b>Boston</b>     | 122            | 54             |
| <b>Somerville</b> | 5              | 170            |

**Table S- 9:** Optimal number of units transported for experiment 10.

| <b>From \ To</b> | <b>Taunton</b> | <b>Hingham</b> |
|------------------|----------------|----------------|
| <b>Melrose</b>   | 5              | 166            |
| <b>Canton</b>    | 96             | 5              |
| <b>Natick</b>    | 5              | 267            |
| <b>Revere</b>    | 96             | 31             |

|                   |   |     |
|-------------------|---|-----|
| <b>Boston</b>     | 5 | 204 |
| <b>Somerville</b> | 5 | 203 |

**Table S- 10:** Optimal number of units transported for experiment 11.

| <b>From \ To</b>  | <b>Taunton</b> | <b>Hingham</b> |
|-------------------|----------------|----------------|
| <b>Melrose</b>    | 121            | 5              |
| <b>Canton</b>     | 205            | 5              |
| <b>Natick</b>     | 5              | 203            |
| <b>Revere</b>     | 121            | 5              |
| <b>Boston</b>     | 204            | 5              |
| <b>Somerville</b> | 5              | 203            |

**Table S- 11:** Optimal number of units transported for experiment 12

| <b>From \ To</b>  | <b>Taunton</b> | <b>Hingham</b> |
|-------------------|----------------|----------------|
| <b>Melrose</b>    | 5              | 112            |
| <b>Canton</b>     | 171            | 5              |
| <b>Natick</b>     | 5              | 180            |
| <b>Revere</b>     | 122            | 5              |
| <b>Boston</b>     | 54             | 122            |
| <b>Somerville</b> | 5              | 170            |

**Table S- 12:** Optimal number of units transported for experiment 13.

| <b>From \ To</b>  | <b>Taunton</b> | <b>Hingham</b> |
|-------------------|----------------|----------------|
| <b>Melrose</b>    | 137            | 34             |
| <b>Canton</b>     | 5              | 5              |
| <b>Natick</b>     | 5              | 59             |
| <b>Revere</b>     | 102            | 5              |
| <b>Boston</b>     | 54             | 122            |
| <b>Somerville</b> | 5              | 170            |

**Table S- 13:** Optimal number of units transported for experiment 14

| <b>From \ To</b>  | <b>Taunton</b> | <b>Hingham</b> |
|-------------------|----------------|----------------|
| <b>Melrose</b>    | 5              | 166            |
| <b>Canton</b>     | 10             | 5              |
| <b>Natick</b>     | 5              | 268            |
| <b>Revere</b>     | 10             | 97             |
| <b>Boston</b>     | 5              | 171            |
| <b>Somerville</b> | 5              | 170            |

**Table S- 14:** Optimal number of units transported for experiment 15

| <b>From \ To</b> | <b>Taunton</b> | <b>Hingham</b> |
|------------------|----------------|----------------|
| <b>Melrose</b>   | 91             | 91             |
| <b>Canton</b>    | 176            | 5              |

|                   |     |     |
|-------------------|-----|-----|
| <b>Natick</b>     | 5   | 176 |
| <b>Revere</b>     | 121 | 5   |
| <b>Boston</b>     | 145 | 64  |
| <b>Somerville</b> | 5   | 203 |

**Table S- 15:** Optimal number of units transported for experiment 16

| <b>From \ To</b>  | <b>Taunton</b> | <b>Hingham</b> |
|-------------------|----------------|----------------|
| <b>Melrose</b>    | 74             | 32             |
| <b>Canton</b>     | 151            | 5              |
| <b>Natick</b>     | 5              | 193            |
| <b>Revere</b>     | 102            | 5              |
| <b>Boston</b>     | 122            | 54             |
| <b>Somerville</b> | 5              | 170            |

**Table S- 16:** Optimal number of units transported for experiment 17

| <b>From \ To</b>  | <b>Taunton</b> | <b>Hingham</b> |
|-------------------|----------------|----------------|
| <b>Melrose</b>    | 5              | 122            |
| <b>Canton</b>     | 197            | 5              |
| <b>Natick</b>     | 5              | 210            |
| <b>Revere</b>     | 121            | 5              |
| <b>Boston</b>     | 80             | 129            |
| <b>Somerville</b> | 5              | 203            |

**Table S- 17:** Optimal number of units transported for experiment 18

| <b>From \ To</b>  | <b>Taunton</b> | <b>Hingham</b> |
|-------------------|----------------|----------------|
| <b>Melrose</b>    | 165            | 5              |
| <b>Canton</b>     | 5              | 5              |
| <b>Natick</b>     | 5              | 58             |
| <b>Revere</b>     | 53             | 5              |
| <b>Boston</b>     | 88             | 5              |
| <b>Somerville</b> | 34             | 58             |

**Table S- 18:** Optimal number of units transported for experiment 19

| <b>From \ To</b>  | <b>Taunton</b> | <b>Hingham</b> |
|-------------------|----------------|----------------|
| <b>Melrose</b>    | 112            | 5              |
| <b>Canton</b>     | 161            | 5              |
| <b>Natick</b>     | 5              | 170            |
| <b>Revere</b>     | 102            | 5              |
| <b>Boston</b>     | 171            | 5              |
| <b>Somerville</b> | 5              | 170            |



**Table S- 19:** Optimal number of units transported for experiment 20

| <b>From \ To</b>  | <b>Taunton</b> | <b>Hingham</b> |
|-------------------|----------------|----------------|
| <b>Melrose</b>    | 5              | 166            |
| <b>Canton</b>     | 96             | 5              |
| <b>Natick</b>     | 5              | 267            |
| <b>Revere</b>     | 96             | 31             |
| <b>Boston</b>     | 5              | 204            |
| <b>Somerville</b> | 5              | 203            |

**Table S- 20:** Optimal number of units transported for experiment 21

| <b>From \ To</b>  | <b>Taunton</b> | <b>Hingham</b> |
|-------------------|----------------|----------------|
| <b>Melrose</b>    | 5              | 112            |
| <b>Canton</b>     | 5              | 5              |
| <b>Natick</b>     | 5              | 112            |
| <b>Revere</b>     | 5              | 54             |
| <b>Boston</b>     | 5              | 88             |
| <b>Somerville</b> | 5              | 87             |

**Table S- 21:** Optimal number of units transported for experiment 22

| <b>From \ To</b>  | <b>Taunton</b> | <b>Hingham</b> |
|-------------------|----------------|----------------|
| <b>Melrose</b>    | 5              | 122            |
| <b>Canton</b>     | 202            | 5              |
| <b>Natick</b>     | 5              | 204            |
| <b>Revere</b>     | 121            | 5              |
| <b>Boston</b>     | 86             | 123            |
| <b>Somerville</b> | 5              | 203            |

**Table S- 22:** Optimal number of units transported for experiment 23

| <b>From \ To</b>  | <b>Taunton</b> | <b>Hingham</b> |
|-------------------|----------------|----------------|
| <b>Melrose</b>    | 5              | 165            |
| <b>Canton</b>     | 5              | 5              |
| <b>Natick</b>     | 5              | 59             |
| <b>Revere</b>     | 5              | 54             |
| <b>Boston</b>     | 5              | 88             |
| <b>Somerville</b> | 5              | 87             |

**Table S- 23:** Optimal number of units transported for experiment 24

| <b>From \ To</b> | <b>Taunton</b> | <b>Hingham</b> |
|------------------|----------------|----------------|
| <b>Melrose</b>   | 112            | 5              |
| <b>Canton</b>    | 151            | 5              |

|                   |     |     |
|-------------------|-----|-----|
| <b>Natick</b>     | 5   | 180 |
| <b>Revere</b>     | 102 | 5   |
| <b>Boston</b>     | 161 | 15  |
| <b>Somerville</b> | 5   | 170 |

**Table S- 24:** Optimal number of units transported for experiment 25

| <b>From \ To</b>  | <b>Taunton</b> | <b>Hingham</b> |
|-------------------|----------------|----------------|
| <b>Melrose</b>    | 43             | 74             |
| <b>Canton</b>     | 5              | 5              |
| <b>Natick</b>     | 5              | 112            |
| <b>Revere</b>     | 43             | 16             |
| <b>Boston</b>     | 5              | 88             |
| <b>Somerville</b> | 5              | 87             |

**Table S- 25:** Optimal number of units transported for experiment 26

| <b>From \ To</b>  | <b>Taunton</b> | <b>Hingham</b> |
|-------------------|----------------|----------------|
| <b>Melrose</b>    | 73             | 44             |
| <b>Canton</b>     | 151            | 5              |
| <b>Natick</b>     | 5              | 180            |
| <b>Revere</b>     | 102            | 5              |
| <b>Boston</b>     | 122            | 54             |
| <b>Somerville</b> | 5              | 170            |

**Table S- 26:** Optimal number of units transported for experiment 27

| <b>From \ To</b>  | <b>Taunton</b> | <b>Hingham</b> |
|-------------------|----------------|----------------|
| <b>Melrose</b>    | 5              | 166            |
| <b>Canton</b>     | 96             | 5              |
| <b>Natick</b>     | 5              | 267            |
| <b>Revere</b>     | 96             | 30             |
| <b>Boston</b>     | 5              | 205            |
| <b>Somerville</b> | 5              | 203            |

### **Part III: Data**

In this section two different survey databases were used, Commercial Buildings Energy Consumption Survey (CBECS) was for collection centers and reselling centers energy data. Manufacturing Energy Consumption Survey (MECS) was used for remanufacturing facilities energy data.

*Commercial Buildings Energy Consumption Survey (CBECS)*

CBECS is a national sample survey that collects information on commercial buildings, including their energy-related building characteristics and energy usage data (consumption and expenses). Commercial buildings include all buildings in which at least half of the floor space is used for a purpose that is not residential, industrial, or agricultural. The latest survey was conducted in 2012, and the microdate file contains 6,720 records for building characteristics in the USA (EIA, U.S., 2012b)

Our model used the following criteria from the survey for the collection and resellers centers, as shown in Figure 1 and 2:

Principal building activity: Retail (other than mall)

Census region and division: New England

Establishment counts, total floor-space per establishment, space-heating, cooling, ventilation, water-heating, lighting, cooking, refrigeration, office equipment, computers, and others. This helps in classify our commercial buildings fixed and variable cost and usage. Most of their usages are: electricity and natural gas. CBECS data were used in identify the collection centers and the reselling centers in our numerical example.

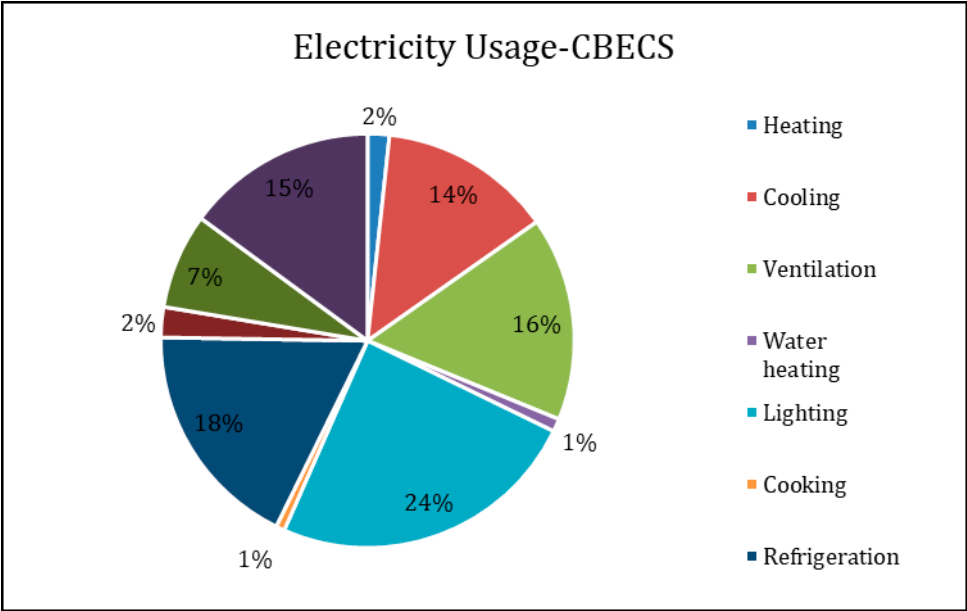

**Figure S- 1:** Electricity usage data derived from Commercial Buildings Energy Consumption Survey (CBECS) for electrical equipment, appliances, and components industry of New England region.

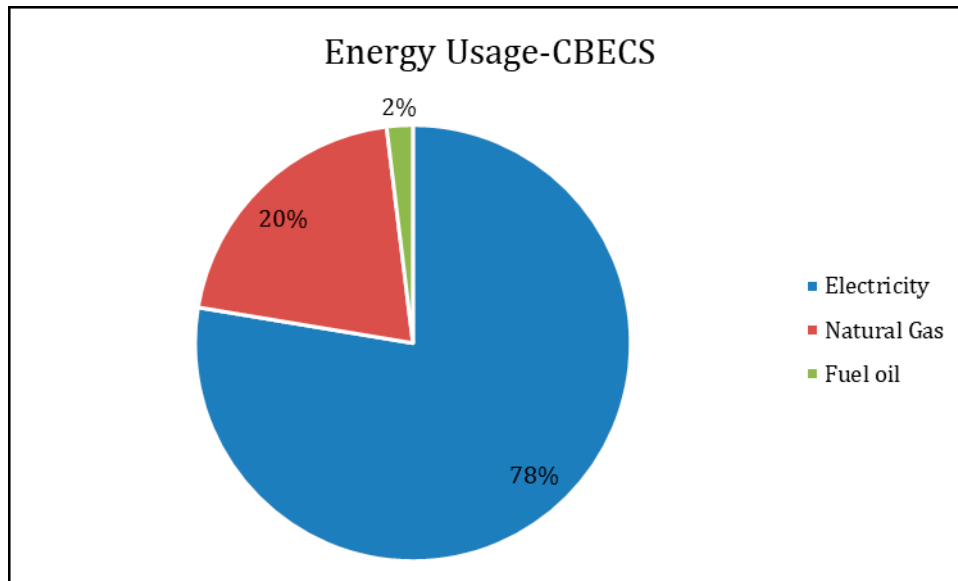

**Figure S- 2:** Energy usage data derived from Commercial Buildings Energy Consumption Survey (CBECS) for retail sector of New England region.

#### *Manufacturing Energy Consumption Survey (MECS)*

MECS is a national sample survey that collects information on manufacturing establishments, their energy-related building characteristics and their energy consumption and expenses. The MECS was first conducted in 1985, the most recent survey was in 2010; the first data set was made available in February, 2013. MECS is currently conducted on a quadrennial basis, and uses the North American Industry Classification System (NAICS) to classify business establishments according to the type of economic activity (process of production) in Canada, Mexico and the USA (EIA, U.S., 2010a).

Our model used the following criteria from this survey for the remanufacturing facilities, as shown in Figure 3 and 4:

NAICS Code: 335

Subsector and Industry: Electrical Equip., Appliances, and Components

Census region and division: New England

Establishments counts, total floor-space per establishment, process heating, process cooling and refrigeration, machine drive, facility HVAC, and facility lighting.

Most of their usages are: electricity and natural gas. Distillate fuel oil and diesel, and residual fuel oil are less than 0.5 million bbl. MECS data were used in identify the remanufacturing facilities in our numerical example.

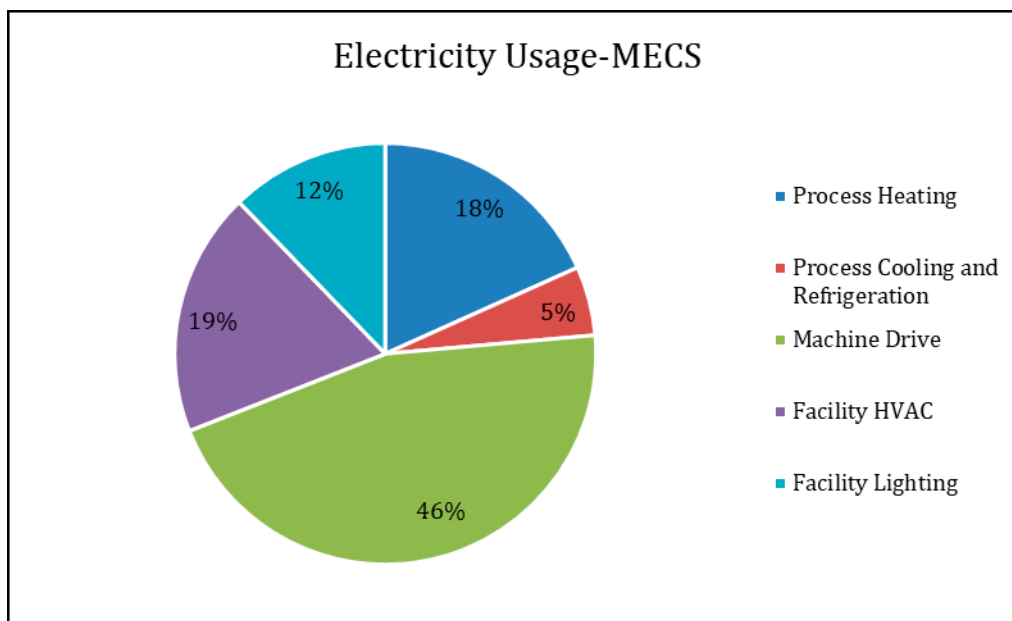

**Figure S- 3:** Electricity usage data derived from Manufacturing Energy Consumption Survey (MECS) for electrical equipment, appliances, and components industry of New England region.

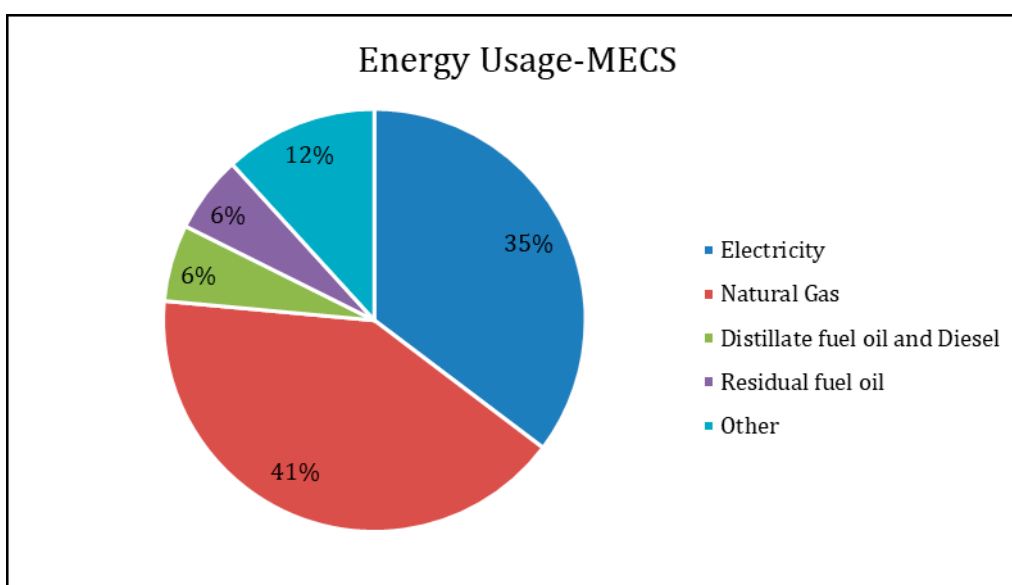

**Figure S- 4:** Energy usage data derived from Manufacturing Energy Consumption Survey (MECS) for electrical equipment, appliances, and components industry of New England region.

**Table S29.** Actual rent cost for collection centers (Melrose, Canton, and Natick), two remanufacturing facilities (Taunton and Hingham), and three reselling centers (Revere, Boston, and Somerville) used in the deterministic model

**Table S30.** Actual number of laborers and their cost per year for collection centers (Melrose, Canton, and Natick), two remanufacturing facilities (Taunton and Hingham), and three reselling centers (Revere, Boston, and Somerville) used in the deterministic model

**Table S31.** Actual trip distances between locations in miles

**Table S- 27:** Actual rent cost for collection centers (Melrose, Canton, and Natick), two remanufacturing facilities (Taunton and Hingham), and three reselling centers (Revere, Boston, and Somerville) used in the deterministic model.

| Cities     | Space (Sq ft) | Rent per Sq ft/year | Total rent per year |
|------------|---------------|---------------------|---------------------|
| Canton     | 1000          | \$14.4              | \$4,220             |
| Natick     | 3000          | \$10.5              | \$10,575            |
| Melrose    | 1500          | \$15.0              | \$7,460             |
| Taunton    | 10000         | \$11.0              | \$110,000           |
| Hingham    | 9801          | \$8.0               | \$78,408            |
| Revere     | 2700          | \$10.0              | \$27,000            |
| Boston     | 5100          | \$25.0              | \$127,500           |
| Somerville | 4000          | \$17.0              | \$68,000            |

**Table S- 28:** Actual number of laborers and their cost per year for collection centers (Melrose, Canton, and Natick), two remanufacturing facilities (Taunton and Hingham), and three reselling centers (Revere, Boston, and Somerville) used in the deterministic model.

| Cities     | Number of laborers | Labor cost per year |
|------------|--------------------|---------------------|
| Canton     | 5                  | \$93,600            |
| Natick     | 3                  | \$56,160            |
| Melrose    | 4                  | \$74,880            |
| Taunton    | 15                 | \$280,800           |
| Hingham    | 17                 | \$318,240           |
| Revere     | 4                  | \$74,880            |
| Boston     | 3                  | \$56,160            |
| Somerville | 6                  | \$112,320           |

**Table S- 29:** Actual trip distances between locations in miles.

| <b>To</b><br><b>From</b> | Taunton | Hingham |
|--------------------------|---------|---------|
| Melrose                  | 52.8    | 28.1    |
| Canton                   | 17.2    | 19.3    |
| Natick                   | 37.0    | 30.5    |
| Revere                   | 45.0    | 24.0    |
| Boston                   | 40.0    | 19.0    |
| Somerville               | 43.0    | 22.0    |

#### Part IV: Statistical Analysis Results

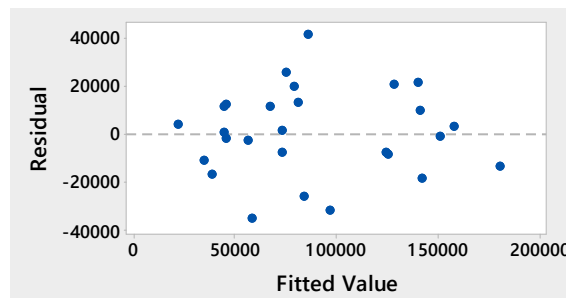

**Figure S- 5:** The residuals plotted against the predicted values, to test homogeneousness of the residual.

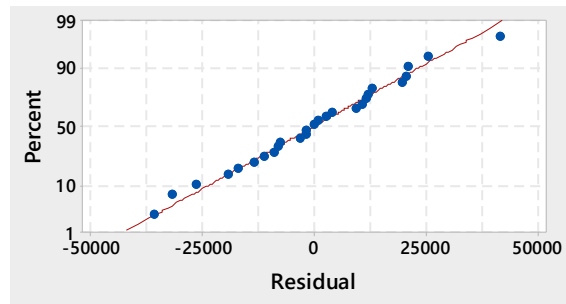

**Figure S- 6:** Normal probability plot of residuals to test normality assumption.
